# Supplementary material
Source: PubMed Central journal article supplement (PMC4174728)
Supplement: NIHMS605020-supplement-Supp_Material.pdf [file NIHMS605020-supplement-Supp_Material.pdf]

## SUPPLEMENTAL FIGURE LEGENDS

Suppl. Figure 1. Mitochondrial DNA was higher in serum from AALF non-survivors at the time of peak ALT. DNA for subunits of NADH Dehydrogenase (NADH Deh) (A and C) and Cytochrome C Oxidase (Cyt C Ox) (B and D) that are specifically encoded in Mitochondrial DNA (mtDNA) were measured in the first serum sample after study admission (A and B) or the nearest sample to the time of peak ALT (C and D) from acetaminophen-induced acute liver failure (AALF) patients who did (n = 34) or did not (n = 35) survive. S = survivors. NS = non-survivors. Dot histograms and box plots are shown. Boxes show the median and 25<sup>th</sup> and the 75<sup>th</sup> percentiles. Bars show the 10<sup>th</sup> and the 90<sup>th</sup> percentiles. \*p < 0.05.

Suppl. Figure 2. Mitochondrial damage biomarkers predict death in AALF patients. Receiver operating characteristic (ROC) curves for the mitochondrial damage biomarker index (MDBI). Data from acetaminophen-induced acute liver failure (AALF) patients who did (n = 34) or did not (n = 35) survive from the sample drawn nearest to the time of peak ALT were used. AUC = area under the curve. AUC > 0.5 with p < 0.05 is considered predictive of death.

**A**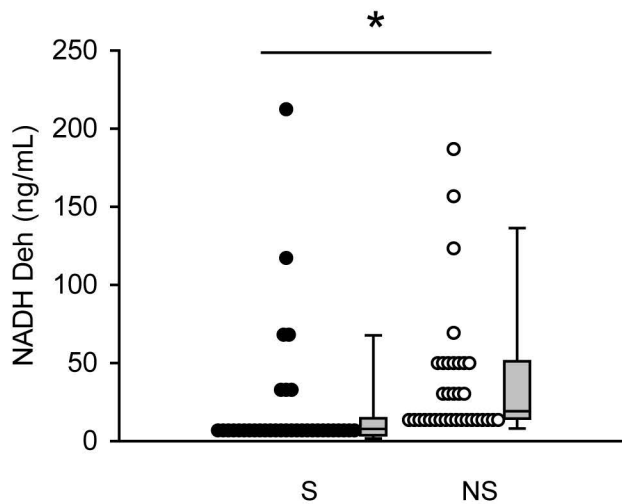**B**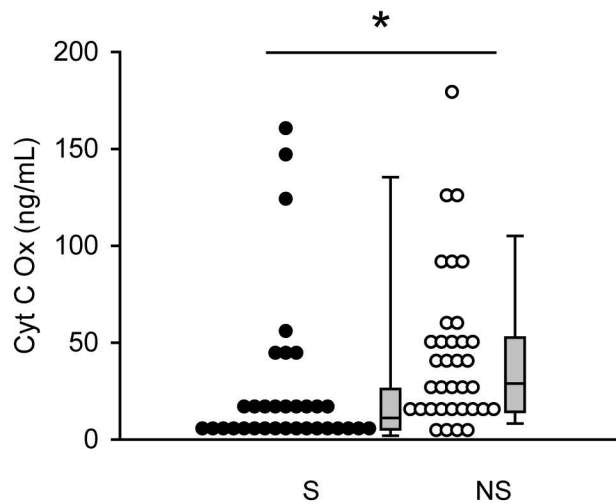**C**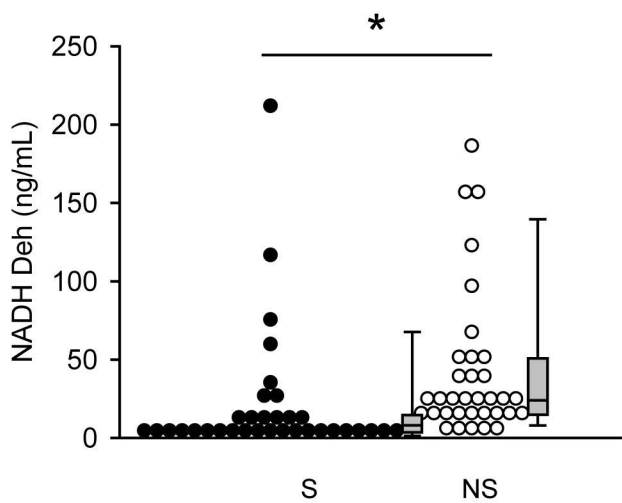**D**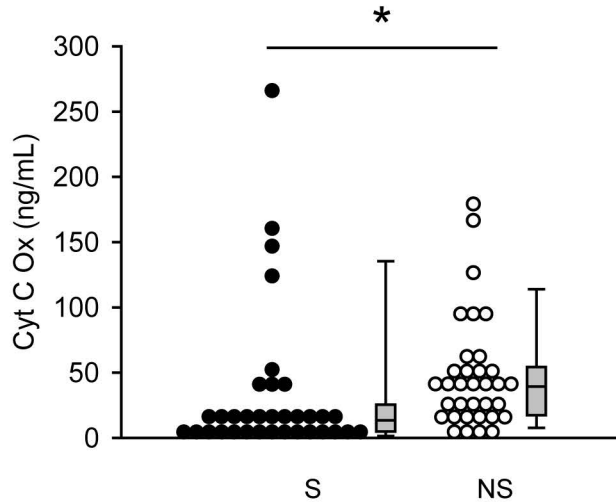

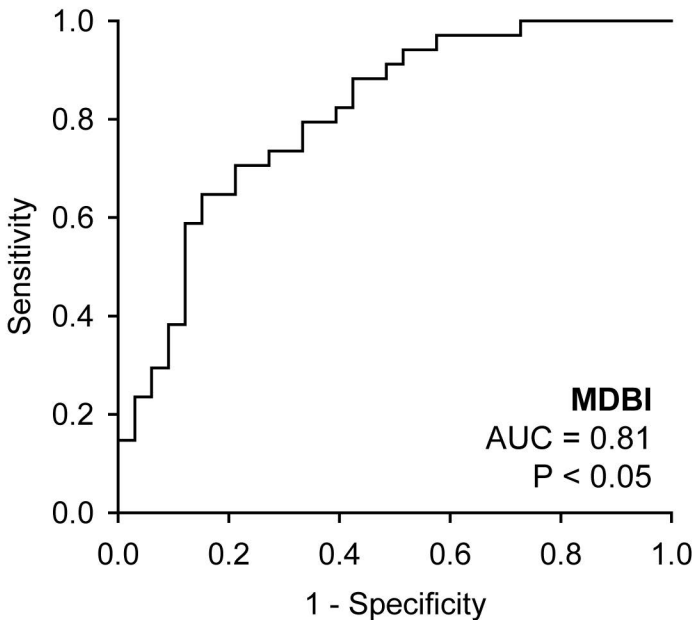

**Serum mitochondrial biomarkers and damage-associated molecular patterns are higher in acetaminophen overdose patients with poor outcome**

**SUPPLEMENTARY TABLES**

Suppl. Table 1. Logistic Regression Results

|      | Odds Ratio<br>(OR) | 95% CI for OR | C-statistic | <i>p</i> -value for<br>OR |
|------|--------------------|---------------|-------------|---------------------------|
| ALT  | 1.000              | 1.000, 1.000  | 0.613       | 0.248                     |
| MELD | 1.110              | 1.042, 1.183  | 0.774*      | 0.001                     |
| MDBI | 1.888              | 1.347, 2.647  | 0.808*      | <0.001                    |

MELD = Model for End Stage Liver Disease. MDBI = Mitochondrial Damage Biomarker Index.

\* $p < 0.05$ .

**Suppl. Table 2. Spearman Correlation Coefficients, MELD vs. Mitochondrial Damage Biomarkers.**

|            | ALT                      | GDH                      | nDNA frag                | mtDNA                    | MELD                     | Bilirubin                | Creatinine               | INR                      |
|------------|--------------------------|--------------------------|--------------------------|--------------------------|--------------------------|--------------------------|--------------------------|--------------------------|
| ALT        | 1                        | <b>0.428<sup>c</sup></b> | <b>0.345<sup>b</sup></b> | <b>0.332<sup>b</sup></b> | <b>0.456<sup>c</sup></b> | 0.122                    | <b>0.248<sup>a</sup></b> | <b>0.407<sup>c</sup></b> |
| GDH        | <b>0.428<sup>c</sup></b> | 1                        | <b>0.487<sup>c</sup></b> | <b>0.451<sup>c</sup></b> | <b>0.446<sup>c</sup></b> | 0.126                    | <b>0.409<sup>c</sup></b> | 0.179                    |
| nDNA frag  | <b>0.345<sup>b</sup></b> | <b>0.487<sup>c</sup></b> | 1                        | <b>0.550<sup>c</sup></b> | <b>0.445<sup>c</sup></b> | <b>0.272<sup>a</sup></b> | 0.140                    | <b>0.473<sup>c</sup></b> |
| mtDNA      | <b>0.332<sup>b</sup></b> | <b>0.451<sup>c</sup></b> | <b>0.550<sup>c</sup></b> | 1                        | <b>0.314<sup>a</sup></b> | 0.204                    | 0.210                    | <b>0.299<sup>a</sup></b> |
| MELD       | <b>0.456<sup>c</sup></b> | <b>0.446<sup>c</sup></b> | <b>0.445<sup>c</sup></b> | <b>0.314<sup>a</sup></b> | 1                        | <b>0.575<sup>c</sup></b> | <b>0.684<sup>c</sup></b> | <b>0.630<sup>c</sup></b> |
| Bilirubin  | 0.122                    | 0.126                    | <b>0.272<sup>a</sup></b> | 0.204                    | <b>0.575<sup>c</sup></b> | 1                        | <b>0.310<sup>b</sup></b> | 0.202                    |
| Creatinine | <b>0.248<sup>a</sup></b> | <b>0.409<sup>c</sup></b> | 0.140                    | 0.210                    | <b>0.684<sup>c</sup></b> | <b>0.310<sup>c</sup></b> | 1                        | 0.042                    |
| INR        | <b>0.407<sup>c</sup></b> | 0.179                    | <b>0.473<sup>c</sup></b> | <b>0.299<sup>a</sup></b> | <b>0.630<sup>c</sup></b> | 0.202                    | 0.042                    | 1                        |

<sup>a</sup>p < 0.05. <sup>b</sup>p < 0.01. <sup>c</sup>p < 0.001.
